# Supplementary material for: Etiology and treatment of adrenoleukodystrophy: new insights from Drosophila
Source: PubMed Central journal article supplement (PMC6031365; doi:10.1242/dmm.031286), 2018-06-15
Supplement: dmm-11-031286-s1.pdf [file dmm-11-031286-s1.pdf]

Hsap ABCD1 aligned with Dmel cg2316:

|             |     |                             |                                 |                           |     |
|-------------|-----|-----------------------------|---------------------------------|---------------------------|-----|
| Dmel cg2316 | 1   | MS-VLSKYVDRIAEKCEHNGFTKHA   | FSYALVTSAILALTIKVTIPYVKNVNTTSSV | RTQKGKTNQQLSPSTRDSSEEDFK  | 79  |
| Hsap ABCD1  | 1   | MTHMLNAAADV--KWTRSSAAKRA--- | ACLVAAYAL--KTLYPIIGKRLKQSG---   | HGKKKAAAYPAAENT-----      | 63  |
| Dmel cg2316 | 80  | LAEAEKLLVAQQLKKKATNNLVE     | PGLNKEFLKHLQMLAKIMIPQAF         | CYETGLLSVHTFCLISRTFLSIYVA | 159 |
| Hsap ABCD1  | 64  | ----EILHCTETICEKPS-----     | PGVNADFFKQLLELRKILFPKLV         | TETGWLCLHSVALISRTFLSIYV   | 134 |
| Dmel cg2316 | 160 | IVRKDIKQFALVLLKWFIAIPAT     | FVNSMIRFLESKLSLAFRTRLV          | RHSYRLFKNQNYRVSNLDGRIEN   | 239 |
| Hsap ABCD1  | 135 | IVEKRPRTFIILKLIKWLMIAIP     | ATFVNSAIRYLECKLALAFRTRL         | VHDHAYETFTNQTYKVINMDGRL   | 214 |
| Dmel cg2316 | 240 | SVFANSVAHLYSLLTKPCFDLML     | IGLALMRSSKMKANIITG              | PALSIGVIALTAHILRIVSPK     | 319 |
| Hsap ABCD1  | 215 | MMFSQSVAHLYSNLTKPILDV       | MLTSTYTLIQTATSRGASPI            | GP                        | 294 |
| Dmel cg2316 | 320 | IHSRIITNAEETAFYGGHKVEM      | QQLRQAYNRLVNQMTTIF              | NQKLWFMLEQFFMKYVWSGT      | 399 |
| Hsap ABCD1  | 295 | VHSRIIANVEETAFYRGHKVEM      | QQLQKSKALADQMNLI                | LSKRLWYIMIEQFLMKYVWS      | 373 |
| Dmel cg2316 | 400 | VPNTAISESRVSERTQYLT         | TARNLLISAADAIERL                | MSSYKEIVSLAGYTF           | 476 |
| Hsap ABCD1  | 374 | --EDGQKQVMVSERTEAF          | TARNLLASGADAIER                 | I                         | 451 |
| Dmel cg2316 | 477 | SNGI-IEFRNGKPIA-KGRII       | YSDDPKNMSISLR                   | AVPVVTPNCDIVVPKLT         | 554 |
| Hsap ABCD1  | 452 | KNGAKVELPLSDTLA             | IKGKVIDVDH----                  | GIICENVPIITPAGEV          | 527 |
| Dmel cg2316 | 555 | WPIYAGELHIPRPVKD            | VPCMFYIPQRPYMS                  | IGSLCDQIITYPD             | 633 |
| Hsap ABCD1  | 528 | WPVYEGVLYKPPQH---           | MFYIPQRPYMSL                    | GLSRDQVIYD                | 603 |
| Dmel cg2316 | 634 | DWKDILSGGEKQRM              | AIARLFYHRPRYAL                  | LDECTSAVSIDVESSI          | 713 |
| Hsap ABCD1  | 604 | DWKDVLSGGEKQRM              | GMARMFYHKPKYAL                  | LDECTSAVSIDVEGKI          | 683 |
| Dmel cg2316 | 714 | QFRKMN-----SDEEQK-----      | GOFLS-----                      | 730                       |     |
| Hsap ABCD1  | 684 | RFEQLDTAIRLTLSEKQK          | LESQLAGIPKMQRLNEL               | CKILGEDSVLKTIKNE          | 740 |

RED = identical residues  
 BLUE = conserved residues

**Figure S1.** Amino acid alignment of human ABCD1 and Drosophila CG2316 shows high levels of conservation. Sequences were aligned using COBALT software through NCBI.

Dmel cg2781 aligned with Hsap ELOVL7, ELOVL1, and ELOVL4:

|                |                                                                                   |     |
|----------------|-----------------------------------------------------------------------------------|-----|
| Dmel cg27811   | MDYLTM-----FYDGWRDLMDnkSDPRTDYPLMSSPF--PTIAISLTYaYIVKVLGPKLMENRKPF                | 60  |
| Hsap ELOVL71   | MAFSD-----LTSRTVHLYDNWI--KD--ADPRVEDWLLMSSPL-PQTILLGFYV-YFVTSLGPKLMENRKPF         | 62  |
| Hsap ELOVL11   | M-----EAVVNLYQEVN--KH--ADPRIQGYPLMGSPPLMSTSILLT-YV-YFVLSLGPRIANRKPF               | 56  |
| Hsap ELOVL41   | MGLLDSepgsvlnvvtALNDTVEFYRWTWSI----ADKRVENWPLMQSPW--PTLSISTLY-LLFVWLGPKWMDREPF    | 73  |
| Dmel cg278161  | ELRKVLIVYNAQVIFSAWLFYESCIGGWLNGYNLRCEPVNYSYSPKAIRTAEGCWYYFVKFTEFFDTFFVVMRKRKRDQ   | 140 |
| Hsap ELOVL763  | ELKKAMITYNFFIVLFSVYMCYEFVMSGWGIGYSFRCDIVDYSRSPALRMARTCWLYYFVKFIELLDTIFFVLRKKNQ    | 142 |
| Hsap ELOVL157  | QLRGFMIVYNFSLVALSLHIVYEFMLMSGWLSYTWRCDPVDYSNSPEALRMVRVAVLFLFSKFIELMDTVIFILRKKDQ   | 136 |
| Hsap ELOVL474  | QMRLVLIYINFGMVLLNLFIFRELPMGSYNAGYSYICQSVSDYNNVHEVRIAAALWVYFVSKGVEYLDTVFFILRKKNNQ  | 153 |
| Dmel cg2781141 | VSTLHVIIHHGIMPVSVVWGVKFTPGGHSTFFGFLNFTFVHIFMYAYYMLAAMGPKVQKYLWKKYLTVMQMIQFVLVMVHS | 220 |
| Hsap ELOVL7143 | VTFLHVFHHTIMPWTWFGVKAAGGLGTFHALLNTAVHVVVMSYGLSALGPAYQKYLWKKYLTSLQLVQFVIVAIHI      | 222 |
| Hsap ELOVL1137 | VTFLHVFHHSVLPWSWWWGVKIAPGGMGSFHAMINSSVHVIMYLYGLSAPGPVAQPYLWKKHMTAIQLIQFVLVSLHI    | 216 |
| Hsap ELOVL4154 | VSFLHVYHHCMTMFTLWVIGIKWVAGGQAFGAQLNSFIHVIMYSYGLTAFGPWIQKYLWKKRYLTMQLIQFHVITIGHT   | 233 |
| Dmel cg2781221 | FQLFFKNDKNYPI-GFAYFIGAHAVMFYFLFSNFYKRAYV--KRDGKDKASVKANGhANGHVKALKDGDVA---PTSNGQ  | 294 |
| Hsap ELOVL7223 | SQFFFMEDCKYQFPVFACIIMSYSFMFPLFLHFWRAYT--KGQRLPKT-VKN-----GTCNKNDN-----            | 281 |
| Hsap ELOVL1217 | SQYYFMSSCNYPVVIHILIWMYGTIFFMLFSNFWYHSYT--KGKRLPRA-LQQNG-APGIAKVKAN-----           | 279 |
| Hsap ELOVL4234 | ALSLY-TDCPPFK-WMHWALIAAISFIFLFLNFYIRTYKepKPKKAGKTAMNGIS-ANGVSKSEQLMIEngkKQKNGK    | 310 |
| Dmel cg2781295 | ANGFhntfskfttdmcnpalnsstrqrvlvnagnk                                               | 329 |
| Hsap ELOVL7    | -----                                                                             |     |
| Hsap ELOVL1    | -----                                                                             |     |
| Hsap ELOVL4311 | AKGD-----                                                                         | 314 |

RED = identical residues  
 BLUE = conserved residues

**Figure S2.** Amino acid alignments of *Drosophila* elongase CG2781 and three human elongases (ELOVL1,4,and 7). Sequences were aligned using COBALT software through NCBI.
